# Supplementary material for: Delayed Antibody Response in the Acute Phase of Infection Is Associated with a Lower Mental Component of Quality of Life in Survivors of Severe and Critical COVID-19
Source: MDPI journal article supplement (doi:10.3390/jcm13071938), 2024-03-27
Supplement: s1 [file s1]

**Stanovisko etickej komisie ku klinickej štúdii**  
*Statement of the Ethics Committee to a clinical study*

|                                                                                                               |                                                                                                                                       |
|---------------------------------------------------------------------------------------------------------------|---------------------------------------------------------------------------------------------------------------------------------------|
| <b>Názov a adresa etickej komisie</b><br><i>Name and address of the Ethics Committee</i>                      | Etická komisia UN Bratislava, Nemocnica akad. L. Déreza<br>Limbová 5<br>833 05 Bratislava<br>Slovenská republika                      |
| <b>Meno a adresa skúšajúceho</b><br><i>Name and address of the investigator</i>                               | doc. MUDr. Peter Sabaka, PhD.<br>Klinika infektológie a geografickej medicíny<br>Limbová 5<br>Bratislava 83305<br>Slovenská republika |
| <b>Názov štúdie</b><br><b>COVID- 19 UNB</b>                                                                   |                                                                                                                                       |
| <b>Sponzor štúdie/ zástupca sponzora v SR</b><br><i>Sponsor of the trial / sponsor's representative in SR</i> |                                                                                                                                       |
| <b>Kód štúdie / Study code</b>                                                                                |                                                                                                                                       |

Etická komisia posúdila žiadosť o štúdiu na základe priložených dokumentov:

*Ethics Committee reviewed the application for the clinical trial according to following documents:*

| <b>Priložené dokumenty / Submitted documents:</b>                                                      | <b>Číslo, verzia, dátum vydania / Number, version, date:</b> |
|--------------------------------------------------------------------------------------------------------|--------------------------------------------------------------|
| <b>Protokol štúdie</b><br><i>Study protocol</i>                                                        | 4 strany                                                     |
| <b>Súhrn protokolu/Protocol synopsis</b>                                                               |                                                              |
| <b>Dodatok k protokolu</b><br><i>Protocol amendment</i>                                                |                                                              |
| <b>Informácia o lieku pre skúšajúceho</b><br><i>Clinical investigator's brochure</i>                   |                                                              |
| <b>Informácia pre pacienta a informovaný súhlas</b><br><i>Patient information and informed consent</i> | 1 strana                                                     |
| <b>Poistenie štúdie</b><br><i>Insurance</i>                                                            |                                                              |
| <b>Záznamník údajov o pacientovi</b><br><i>Case report form</i>                                        |                                                              |
| <b>Iné dokumenty / Other documents:</b>                                                                |                                                              |
| Žiadosť o súhlas s realizáciou výskumu                                                                 | dodané                                                       |
| Životopis hlavného skúšajúceho - doc. MUDr. Sabaka                                                     | dodané                                                       |
| Súhlas vedenia pracoviska KIGM (doc.MUDr. Stankovič)                                                   | dodané                                                       |
| Základný formulár pre neanimálne experimenty                                                           |                                                              |

**Pripomienky / Comments:**

MUDr. Bilíková- Ak budú pacienti s COVID 19 hospitalizovaní na iných oddeleniach,  
je potrebný súhlas od vedenia dotknutých kliník.

Dátum

Date

21.4.2020

podpis / pečiatka

Signature / stamp

súhlasím

Bihorac

Predseda etickej komisie

Chairman of the Ethics Committee

Etická komisia zohľadňuje požiadavky Správnej klinickej praxe (ICH-GCP), Štátneho ústavu pre kontrolu liečiv (ŠÚKL) a platnej legislatívy pre klinické skúšanie v SR.

*The Ethics Committee complies with principles of ICH-GCP and applicable regulatory requirements.*

Klinické skúšanie sa môže vykonať len so súhlasom Štátneho ústavu pre kontrolu liečiv a príslušného zdravotníckeho zariadenia.

*The trial may be realized only with approval of the State Institute of Drug Control and of particular healthcare provider.*

Zoznam prítomných členov etickej komisie je prílohou tohto dokumentu. Hlasovali len členovia etickej komisie nezávislí od sponzora štúdie. Skúšajúci (pokiaľ bol prítomný) sa hlasovania nezúčastnil.

*A list of present members of the Ethics Committee is attached. Only those Ethics Committee members who are independent of the sponsor of the trial have voted. The investigator (if he/she was present) has not participated in the vote of the Ethics Committee.*

**Stanovisko etickej komisie k biomedicínskemu výskumu**  
*Statement of the Ethics Committee to a biomedical research*

Č. rozhodnutia: 18 /2023

|                                                                                                        |                                                                                                                                                                              |
|--------------------------------------------------------------------------------------------------------|------------------------------------------------------------------------------------------------------------------------------------------------------------------------------|
| Názov a adresa etickej komisie<br><i>Name and address of the Ethics Committee</i>                      | Etická komisia UN Bratislava, Nemocnica akad. L. Déřera<br>Limbová 5<br>833 05 Bratislava<br>Slovenská republika                                                             |
| Meno a adresa skúšajúceho<br><i>Name and address of the investigator</i>                               | doc.MUDr. Peter Sabaka. PhD.<br>Klinika infektológie a geografickej medicíny LF UK a UNB<br>Nemocnica akad.L.Dérera<br>Limbová 5<br>831 01 Bratislava<br>Slovenská republika |
| Názov štúdie<br><br><b>COVID-19 - Imunity and quality of life in convalescent patients</b>             |                                                                                                                                                                              |
| Sponzor štúdie/ zástupca sponzora v SR<br><i>Sponsor of the trial / sponsor's representative in SR</i> | Lekárska fakulta UK v Bratislave<br><br>Ústav klinického a translačného výskumu<br>Biomedicínske centrum SAV                                                                 |
| Kód štúdie / <i>Study code</i>                                                                         |                                                                                                                                                                              |

Etická komisia posúdila žiadosť o výskum na základe priložených dokumentov:

*Ethics Committee reviewed the application for the research according to following documents:*

| Priložené dokumenty / <i>Submitted documents:</i>                                               | Číslo, verzia, dátum vydania / <i>Number, version, date:</i> |        |
|-------------------------------------------------------------------------------------------------|--------------------------------------------------------------|--------|
| Protokol štúdie<br><i>Study protocol</i>                                                        | 3 strany                                                     | dodané |
| Súhrn protokolu/ <i>Protocol synopsis</i>                                                       |                                                              |        |
| Dodatok k protokolu<br><i>Protocol amendment</i>                                                |                                                              |        |
| Informácia o lieku pre skúšajúceho<br><i>Clinical investigator's brochure</i>                   |                                                              |        |
| Informácia pre pacienta a informovaný súhlas<br><i>Patient information and informed consent</i> | 1 strana                                                     | dodané |
| Poistenie štúdie<br><i>Insurance</i>                                                            |                                                              |        |
| Záznamník údajov o pacientovi<br><i>Case report form</i>                                        |                                                              |        |
| Iné dokumenty / <i>Other documents:</i>                                                         |                                                              |        |
| Žiadosť o stanovisko Etickej komisie                                                            |                                                              | dodané |
| Životopis hlavného skúšajúceho- doc.Sabaka                                                      |                                                              | dodané |
| Základný formulár pre neanimálne experimenty                                                    | 2 strany                                                     | dodané |
| Súhlas vedenia KIGM LFUK a UNB                                                                  |                                                              | dodané |

Etická komisia **SÚHLASÍ / SÚHLASÍ S PRIPOMIENKAMI** (uvedené nižšie) / **NESÚHLASÍ** (dôvody uvedené nižšie)  
s vykonaním uvedeného biomedicínskeho výskumu .

Ethics Committee **AGREES / AGREES WITH COMMENTS** (stated below) / **DISAGREES** (reasons stated below)  
with submitted biomedical research to be realized.

**Pripomienky / Comments:**

Doplnenie informovaného súhlasu:

dobrovoľná účasť v projekte, právo subjektu odvolať svoj súhlas s účasťou v projekte resp. kedykoľvek z projektu odstúpiť  
spôsob nakladania s dátami účastníkov- dôvernosc' dát, súlad s GDPR

Dodať dotazník alebo súbor otázok pre telefonické opytovanie účastníkov o kvalite života

**Dokumentáciu žiadame doplniť do 31.7.2023.**

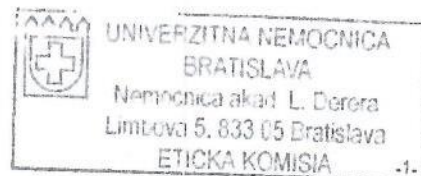

Dátum

27.6.2023

Date

podpis / pečiatka

Signature / stamp

Bilhorád

**Predseda etickej komisie**

*Chairman of the Ethics Committee*

Odôvodnenie: Predložená dokumentácia spĺňa požiadavky Etickej komisie a je v súlade s platnou legislatívou

*Rationale: Enclosed documents comply with the requirements of the Ethics committee and in accordance with law.*

Etická komisia zohľadňuje požiadavky Správnej klinickej praxe (ICH-GCP), Štátneho ústavu pre kontrolu liečiv (ŠÚKL)  
a platnej legislatívy pre klinické skúšanie v SR.

*The Ethics Committee complies with principles of ICH-GCP and applicable regulatory requirements.*

Klinické skúšanie sa môže vykonať len so súhlasom Štátneho ústavu pre kontrolu liečiv a príslušného zdravotníckeho zariadenia.

*The trial may be realized only with approval of the State Institute of Drug Control and of particular healthcare provider.*

Zoznam prítomných členov etickej komisie je prílohou tohto dokumentu. Hlasovali len členovia etickej komisie nezávislí od sponzora štúdie. Skúšajúci (pokiaľ bol prítomný) sa hlasovania nezúčastnil.

*A list of present members of the Ethics Committee is attached. Only those Ethics Committee members who are independent of the sponsor of the trial have voted. The investigator (if he/she was present) has not participated in the vote of the Ethics Committee.*

**Zoznam členov etickej komisie**  
*A list of members of the Ethics Committee*

**Dátum zasadania/Meeting date:** 27.6.2023

**Názov a adresa etickej komisie:**

*Name and address of the Ethics Committee:* Etická komisia UN Bratislava  
 Nemocnica akad.L.Dérera  
 Limbová 5  
 833 05 Bratislava  
 Slovenská republika

| Meno/Name         | Titul/Title             | Povolanie/Occupation               | Pracovisko/Working place             | Prítomný/Present                                                                      |
|-------------------|-------------------------|------------------------------------|--------------------------------------|---------------------------------------------------------------------------------------|
| Billková Katarína | MUDr.<br>Mgr.           | lekár<br>predseda EK               | Odd.klin.farmakológie<br>UNB Ružinov | 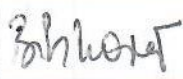  |
| Tibenský Igor     | MUDr.<br>PhD.,MBA       | námestník<br>pre zdr.starostlivosť | UNB Kramáre                          |  |
| Slimáková Ľubica  | PharmDr.<br>MPH.        | farmaceut                          | Lekáreň UNB Kramáre                  |  |
| Paštnáková Viera  | PhDr.<br>MPH.           | námestník OŠ                       | UNB Kramáre                          |  |
| Rimovská Mária    | JUDr.                   | právnik                            | Právne oddelenie<br>UN Bratislava    |  |
| Demeš Martin      | Doc.,MUDr.,<br>PhD.,MPH | internista                         | I. Interná klinika<br>UNB Kramáre    |  |
| Šusterová Adriána | Mgr.                    | farmaceut<br>tajomník EK           | Lekáreň UNB Kramáre                  |  |
| Petričková Helena | JUDr.                   | právnik                            | t.č. v dôchodku                      |  |
